# Supplementary material for: Carbon Nano-Onion-Encapsulated Ni Nanoparticles for High-Performance Lithium-Ion Capacitors
Source: MDPI journal article supplement (doi:10.3390/batteries9020102), 2023-02-02
Supplement: s1 [file s1]

## Supporting Information

# Carbon nano-onion-encapsulated Ni nanoparticles for high-performance lithium-ion capacitors

Xiaohu Zhang<sup>1,4</sup>, Keliang Zhang<sup>4</sup>, Weike Zhang<sup>3</sup>, Xiong Zhang<sup>1,2,4</sup>, Lei Wang<sup>1,2</sup>, Yabin An<sup>1,2,4</sup>, Xianzhong Sun<sup>1,2,4</sup>, Chen Li<sup>1,2,4</sup>, Kai Wang<sup>1,2,4</sup> and Yanwei Ma<sup>1,2,4,\*</sup>

<sup>1</sup> Institute of Electrical Engineering, Chinese Academy of Sciences, Beijing 100190, China; xhzhang@mail.iee.ac.cn (X.Z.); wanglei122333@mail.iee.ac.cn (L.W.); aybmshk@mail.iee.ac.cn (Y.A.); xzsun@mail.iee.ac.cn (X.S.); lichen@mail.iee.ac.cn (C.L.); wangkai@mail.iee.ac.cn (K.W.)

<sup>2</sup> School of Engineering Sciences, University of Chinese Academy of Sciences, Beijing 100049, China

<sup>3</sup> College of Environmental Science and Engineering, Taiyuan University of Technology, Taiyuan 030600, China; zhangweike@tyut.edu.cn (W.Z.)

<sup>4</sup> Institute of Electrical Engineering and Advanced Electromagnetic Drive Technology, Qilu Zhongke, Jinan 250013, China; zhangkeliang@aedt.ac.cn (K.Z.)

\* Correspondence: ywma@mail.iee.ac.cn

\*\* Xiaohu Zhang and Keliang Zhang contributed equally to this work

Table S1. The productivity of CNOs synthesized at different temperatures.

|                                   |      |      |      |
|-----------------------------------|------|------|------|
| Temperature (°C)                  | 700  | 800  | 900  |
| Productivity (g g <sup>-1</sup> ) | 0.57 | 3.86 | 4.11 |

Table S2. The productivity of CNOs synthesized with different flows.

|                                   |        |      |      |
|-----------------------------------|--------|------|------|
| CH <sub>4</sub> flow (sccm)       | 100    | 300  | 500  |
| Productivity (g g <sup>-1</sup> ) | 0.0375 | 2.37 | 3.61 |

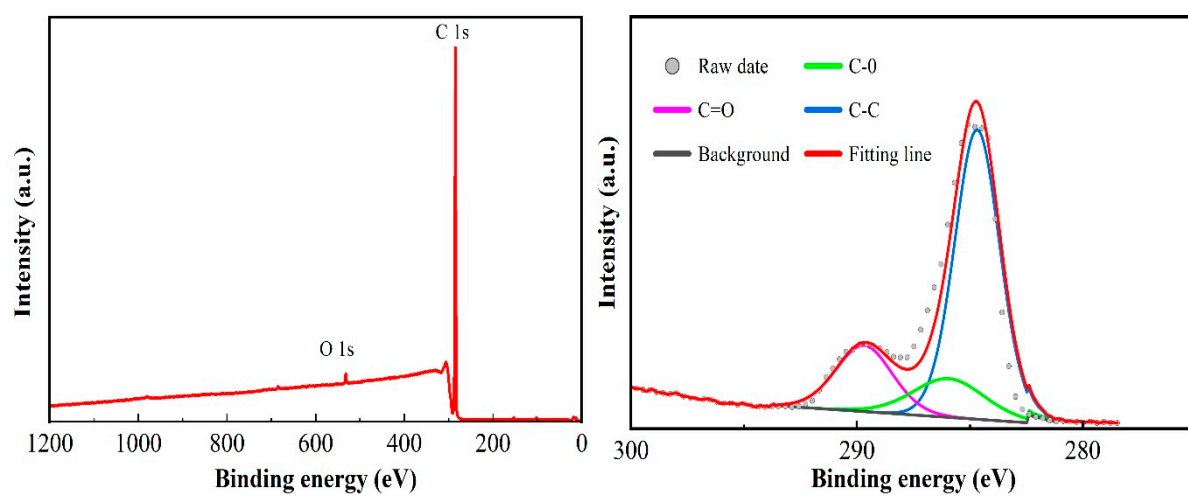

Figure S1. (a) The XPS survey spectrum and (b) high-resolution XPS spectrum of the C 1s region in the Ni@CNOs

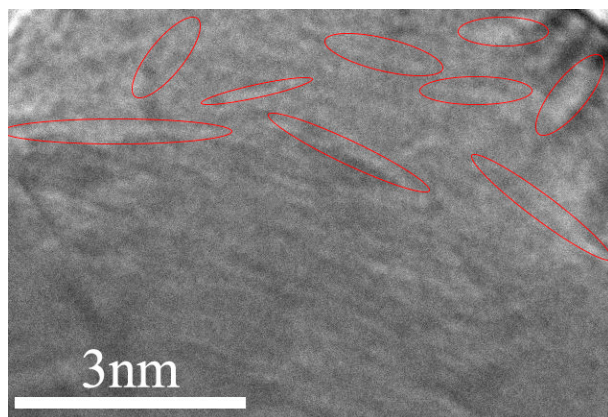

Figure S2. TEM image of the Ni@CNOs.

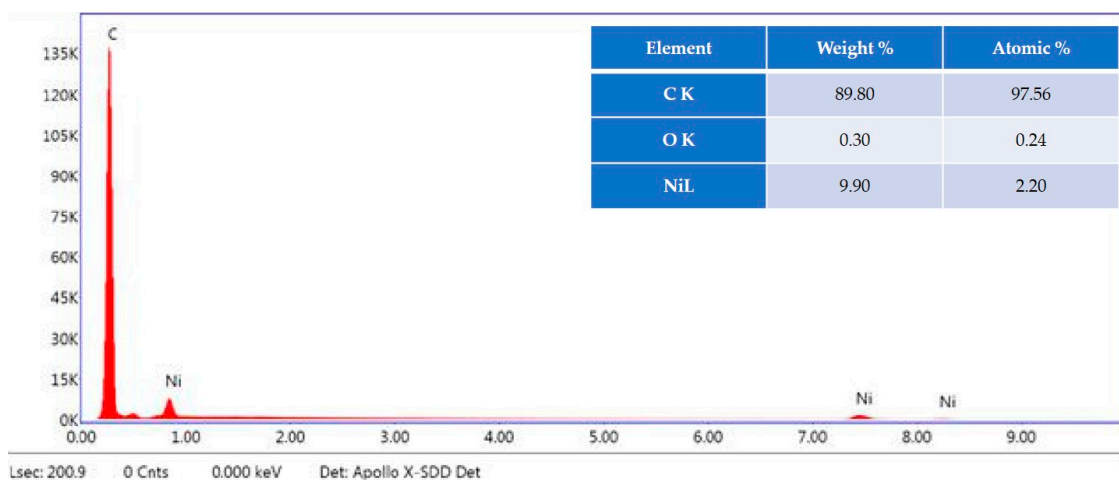

Figure S3. The energy spectra of the Ni@CNOs.
